# Supplementary material
Source: PubMed Central journal article supplement (PMC4818660)
Supplement: NIHMS741412-supplement-1.pdf [file NIHMS741412-supplement-1.pdf]

# Supplementary Figure 1

## A MSC (DSRED) and MOLM 13 (GFP) 3D cultures

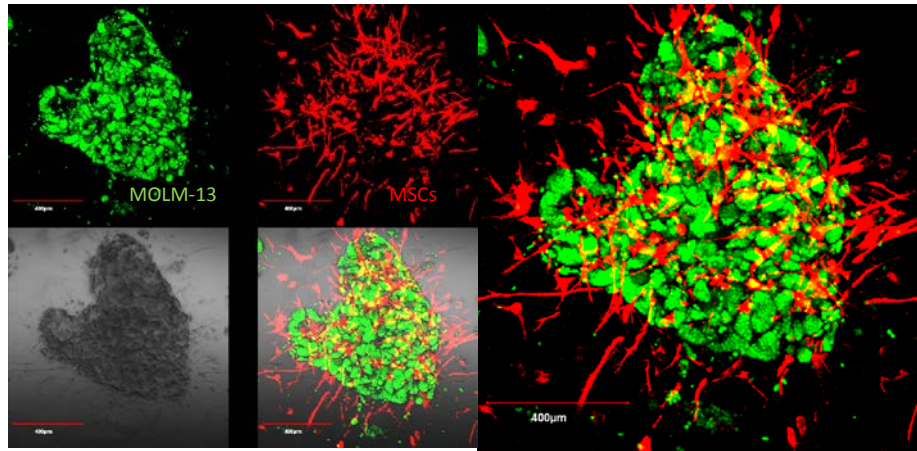

## B 2D

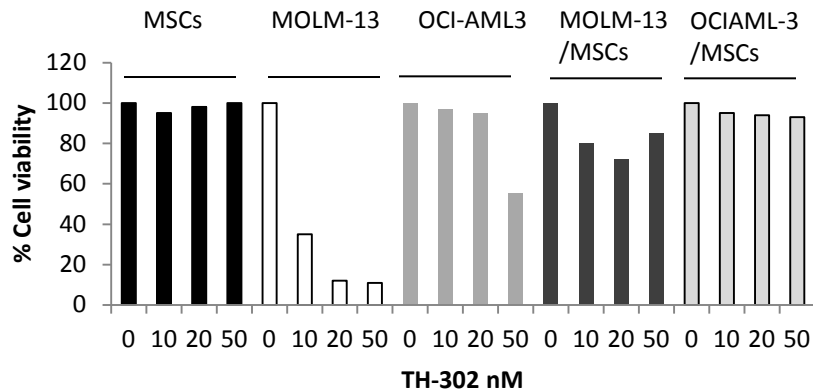

## C

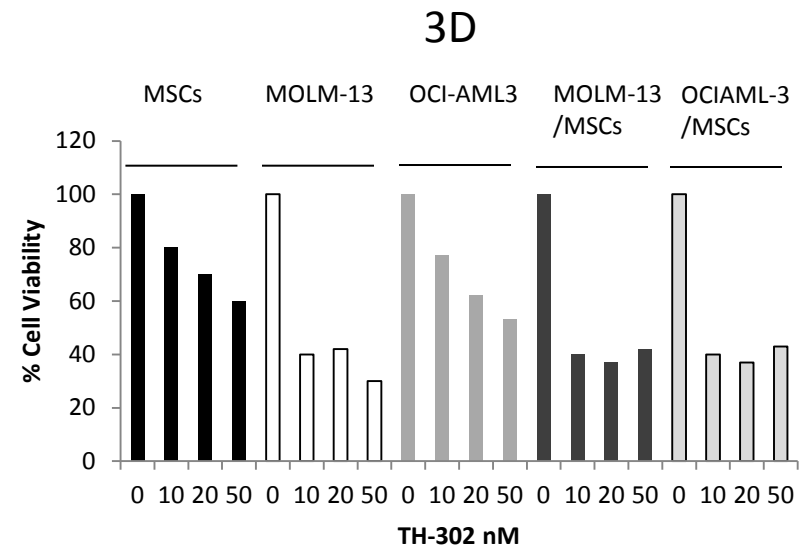

-TH-302

+TH-302

MOLM-13/MSCs

OCIAML-3/MSCs

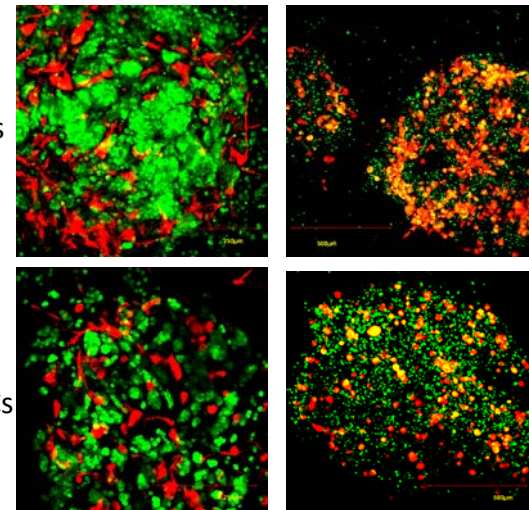

**Supplementary Figure 1. TH-302 has potent antitumor activity in a 3D *in vitro* co-culture system of leukemia cells and bone marrow-derived mesenchymal stromal cells that recapitulates the multidimensional BM niche.** A. Confocal images of a spheroid formed by mesenchymal stromal cells (MSCs; red) and MOLM-13 (green) cells. B and C. TH-302 cytotoxic activity, as determined by WST-1 assay, against 3D or 2D co-cultured MSC-leukemia cells, respectively, incubated with indicated concentrations of the drug for 72 h. Right panel shows confocal images of 3D MSC-leukemia cell spheroids incubated with or without TH-302 (50 nM) for 72 h.

## Supplementary figure 2

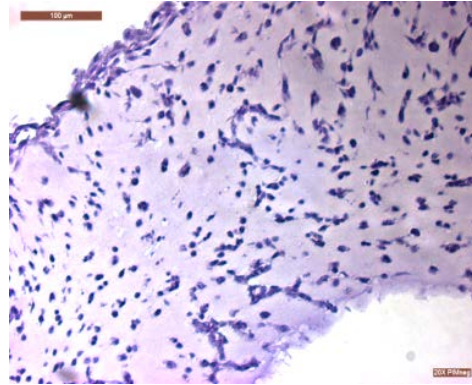

PIMO negative control

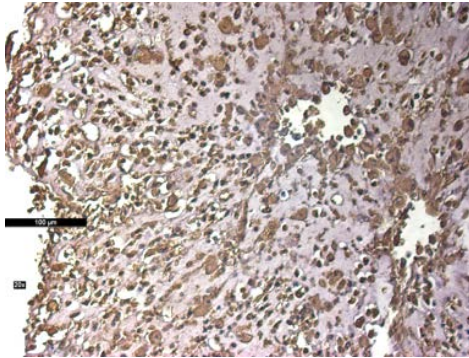

Supplementary Figure 2. Hypoxia is present in spheroids as indicated by PIMO positive staining in spheroids incubated with PIMO for 3hr before harvesting

# Supplementary figure 3

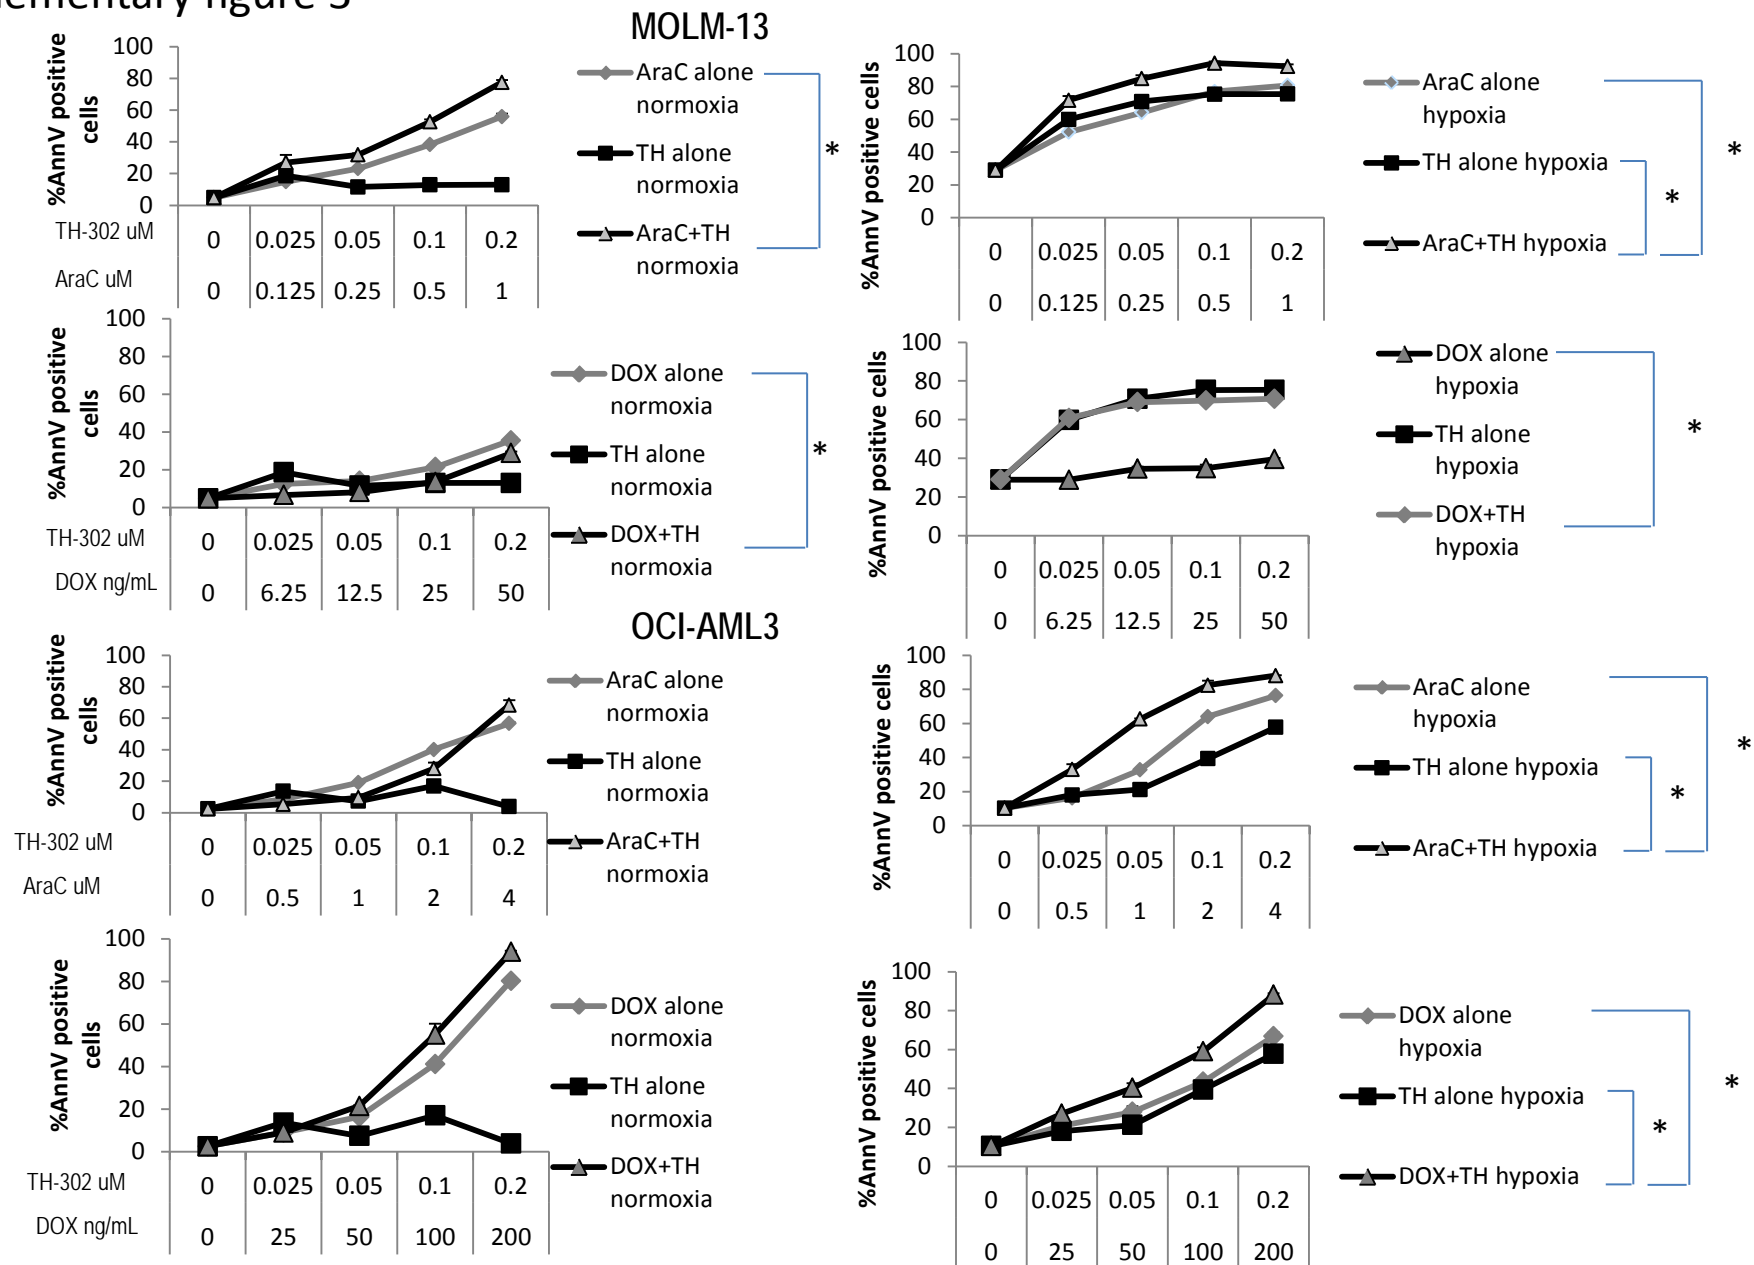

**Supplementary figure 3.** In vitro synergistic activity of TH-302 in combination with chemotherapy and demethylating agents. MOLM-13 and OCI-AML3 AML cell lines were exposed to TH-302 alone or in combination with AraC, 5ZA or DAC for 72hr under normoxic (21% O<sub>2</sub>; graphs on the left) or hypoxic (1%O<sub>2</sub>; graphs on the right) conditions. Effects on cell growth and apoptosis induction were determined by FACS. The asterisk next to the legend denotes a p value <0.05 (t-test).

OCI-AML3

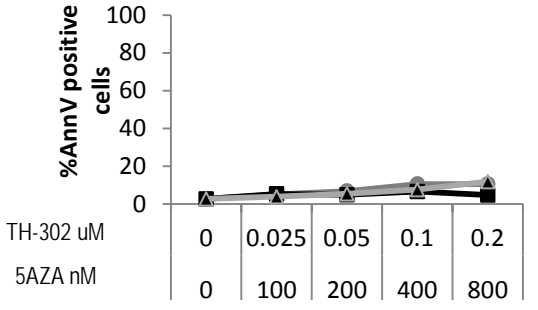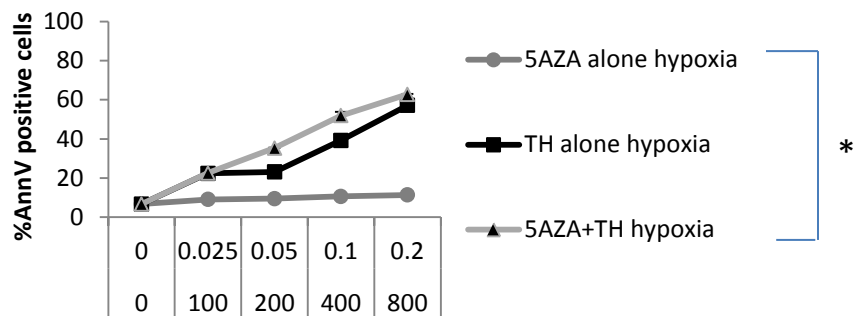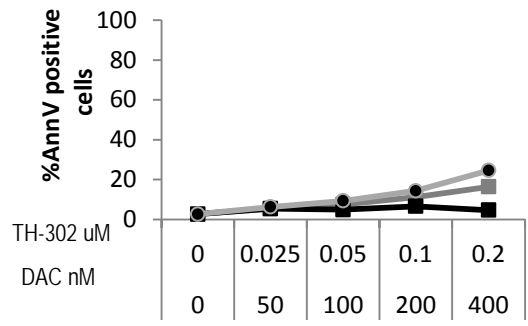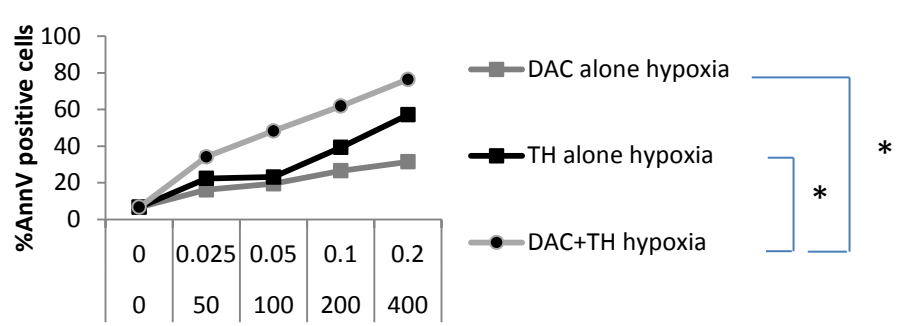

Supplementary figure 4

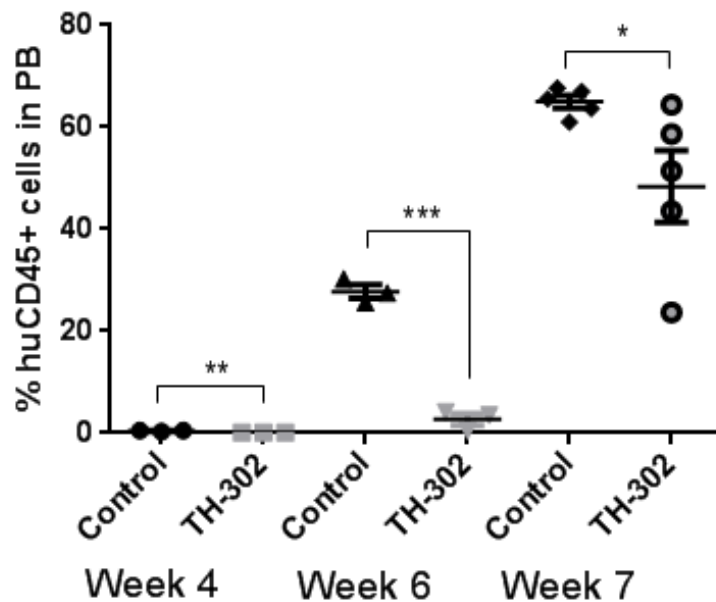

**Supplementary Figure 4. TH-302 has anti-leukemia activity in an *in vivo* primary AML xenograft murine model.** Secondary transplant mice (N=5/group). NSG mice were transplanted with  $0.01$  or  $0.005 \times 10^6$  BM cells isolated from primary recipients treated with control or TH-302 (Figure 4). The percentage of circulating human CD45+ cells was determined by FACS in peripheral blood (PB) of mice transplanted with  $0.01 \times 10^6$  cells at weeks 4, 6, and 7 after transplantation. \*  $P < 0.05$ ; \*\*  $P < 0.01$ ; \*\*\*  $P < 0.001$ .

# Supplementary figure 5

## MOLM-13-48hr

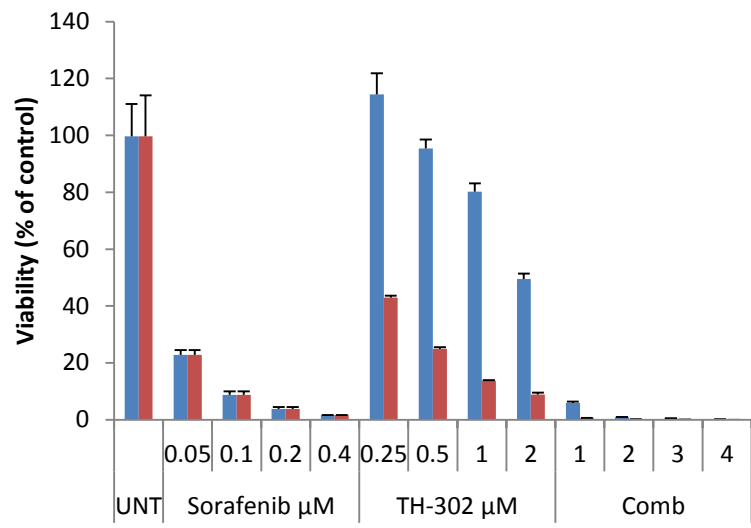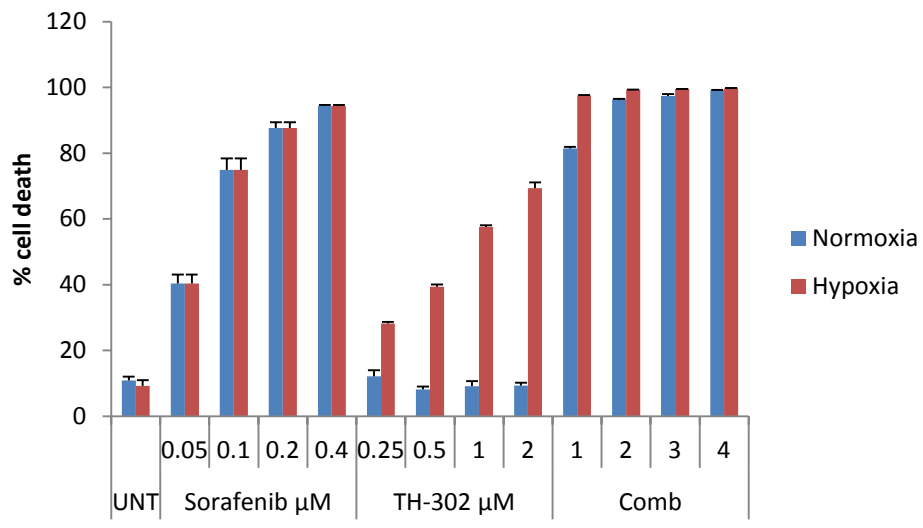

| Drug                      | CI Values at |       |       |
|---------------------------|--------------|-------|-------|
|                           | ED50         | ED75  | ED90  |
| sorafenib+TH-302 normoxia | 0.387        | 0.428 | 0.476 |
| sorafenib+TH-302 hypoxia  | 0.053        | 0.055 | 0.057 |

**Supplementary figure 5.** In vitro synergistic activity of TH-302 in combination with sorafenib. MOLM-13 cells were exposed to TH-302 for 6 h under normoxic (21% O<sub>2</sub>) or hypoxic (1% O<sub>2</sub>). Cells were then washed and incubated with sorafenib for 48 h under normoxia. Effects on cell growth and apoptosis induction were determined by FACS.



# Supplementary figure 6

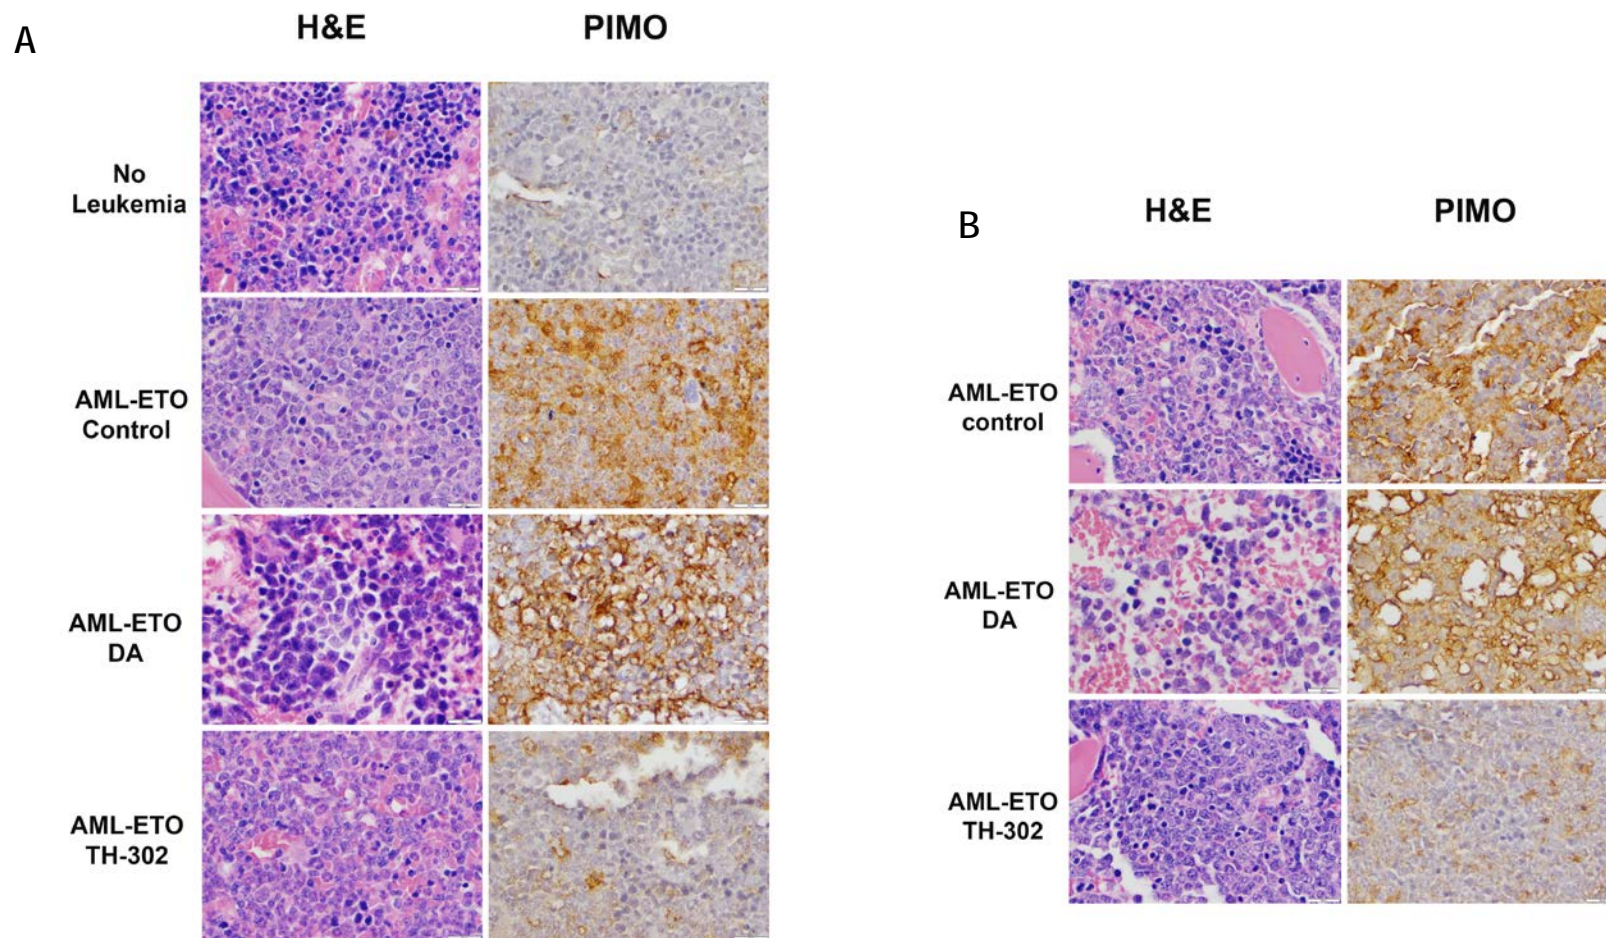

**Supplementary figure 6 A, B.** Assessment of BM hypoxia in AML/ETO bearing mice treated with TH-302 or chemotherapy. C57Bl/6 mice were transplanted via tail vein injection with murine BM cells ( $1 \times 10^6$  viable cells per mouse) expressing the AML1/ETO oncoprotein. Three weeks after transplantation, mice were treated for 5 days with TH-302 (50mg/kg IP) or DA chemotherapy (doxorubicin: 1.5mg/kg IV Day 1-3 and cytarabine 50mg/kg, Day 1-5, first 3 injections IV and last 2 IP). Upon completion of the treatment, mice were injected with PIMO as described under Methods, sacrificed after 3 hrs and bones subjected to anti-PIMO immunohistochemistry. One healthy mouse was injected with PIMO and processed as above (6A, top panel). The extent of leukemia infiltration did not differ significantly between DA- or TH-302-treated mice ( $n=2$ /each, DA, 40% and 40%; TH-302, 30% and 50%). Images of H&E and PIMO staining are shown in respective animals identified by the legends. A, B: independent sets of mice.
